# Supplementary material for: A phase II study of brentuximab vedotin in patients with relapsed or refractory Epstein-Barr virus-positive and CD30-positive lymphomas
Source: PubMed Central journal article supplement — Haematologica. 2021 Apr 1;106(8):2277–80. doi: 10.3324/haematol.2021.278301 (PMC8327727; doi:10.3324/haematol.2021.278301), 2021-04-01

**A phase II study of brentuximab vedotin in patients with relapsed or refractory Epstein-Barr virus-positive and CD30-positive lymphomas**

*Miso Kim,<sup>1,2</sup> Jeong-Ok Lee,<sup>3</sup> Jiwon Koh,<sup>4</sup> Tae Min Kim,<sup>1,2</sup> Ji Yun Lee,<sup>3</sup> Yoon Kyung Jeon,<sup>2,4</sup> Bhumsuk Keam,<sup>1,2</sup> Dong-Wan Kim,<sup>1,2</sup> Jong Seok Lee<sup>3</sup> and Dae Seog Heo<sup>1,2</sup>*

*<sup>1</sup>Department of Internal Medicine, Seoul National University Hospital, Seoul, Republic of Korea; <sup>2</sup>Seoul National University Cancer Research Institute, Seoul, Republic of Korea; <sup>3</sup>Department of Internal Medicine, Seoul National University Bundang Hospital, Seongnam, Republic of Korea and <sup>4</sup>Department of Pathology, Seoul National University Hospital, Seoul, Republic of Korea.*

*Correspondence: TAE MIN KIM - gabriel9@snu.ac.kr*

*doi:10.3324/haematol.2021.278301*

## Supplementary Tables

**Supplementary Table S1. Patients' characteristics**

| <b>Characteristics</b>                                                            | <b>No. of patients (%)</b>     |
|-----------------------------------------------------------------------------------|--------------------------------|
| Age                                                                               | Median 67 (range, 38–87 years) |
| ≤ 60 years                                                                        | 11 (78.6)                      |
| > 60 years                                                                        | 14 (21.4)                      |
| Sex                                                                               |                                |
| Male                                                                              | 20 (80.0)                      |
| Female                                                                            | 5 (20.0)                       |
| Diagnosis                                                                         |                                |
| <b>EBV-positive mature T/NK-cell neoplasms</b>                                    |                                |
| Angioimmunoblastic T-cell lymphoma                                                | 10 (40.0)                      |
| EBV-positive peripheral T-cell lymphoma, NOS                                      | 5 (20.0)                       |
| Extranodal NK-/T-cell lymphoma, nasal type                                        | 4 (16.0)                       |
| Hydroa vacciniform-like T-cell lymphoma                                           | 1 (4.0)                        |
| Mycosis fungoides                                                                 | 1 (4.0)                        |
| EBV-positive T-cell LPDs                                                          | 1 (4.0)                        |
| <b>EBV-positive mature B-cell neoplasms</b>                                       |                                |
| EBV-positive DLBCL of the elderly                                                 | 2 (8.0)                        |
| B cell lymphoma, unclassifiable, with features intermediate between DLBCL and cHL | 1 (4.0)                        |
| CD30 expression                                                                   |                                |
| Low (1 – <10%)                                                                    | 13 (52.0)                      |
| Intermediate (10 – <50%)                                                          | 5 (20.0)                       |
| High (≥ 50%)                                                                      | 7 (28.0)                       |
| Ann Arbor stage at initial diagnosis                                              |                                |

|                         |           |
|-------------------------|-----------|
| II                      | 1 (4.0)   |
| III                     | 7 (28.0)  |
| IV                      | 17 (68.0) |
| ECOG Performance status |           |
| 0                       | 2 (8.0)   |
| 1                       | 23 (92.0) |
| IPI scores              |           |
| 0–1                     | 6 (24.0)  |
| 2                       | 7 (28.0)  |
| 3                       | 7 (28.0)  |
| 4–5                     | 5 (20.0)  |
| Prior lines of therapy  |           |
| 1                       | 10 (40.0) |
| 2                       | 9 (36.0)  |
| ≥3                      | 6 (24.0)  |

Abbreviations: EBV, Epstein-Barr virus; DLBCL, diffuse large B-cell lymphoma; cHL, classical Hodgkin lymphoma; LPD, lymphoproliferative disorder; ECOG, Eastern Cooperative Oncology Group; IPI, International Prognostic Index

**Supplementary Table S2. Treatment-related Adverse Events**

| Toxicities            | Total N (%) | Grade 1 | Grade 2 | Grade 3 | Grade 4 |
|-----------------------|-------------|---------|---------|---------|---------|
| Peripheral neuropathy | 12 (48)     | 8       | 4       | 0       | 0       |
| Neutropenia           | 10 (40)     | 0       | 5       | 3       | 2       |
| Thrombocytopenia      | 5 (20)      | 0       | 2       | 1       | 2       |
| Rash                  | 4 (16)      | 3       | 1       | 0       | 0       |
| Alopecia              | 3 (12)      | 3       | 0       | 0       | 0       |
| Fatigue               | 3 (12)      | 3       | 0       | 0       | 0       |
| Anemia                | 2 (8)       | 0       | 0       | 2       | 0       |
| Decreased appetite    | 2 (8)       | 2       | 0       | 0       | 0       |
| Pruritus              | 2 (8)       | 1       | 1       | 0       | 0       |
| Diarrhea              | 1 (4)       | 0       | 1       | 0       | 0       |
| Dizziness             | 1 (4)       | 1       | 0       | 0       | 0       |
| Hyperglycemia         | 1 (4)       | 1       | 0       | 0       | 0       |
| Epigastric discomfort | 1 (4)       | 1       | 0       | 0       | 0       |
| Asthenia              | 1 (4)       | 1       | 0       | 0       | 0       |
| Pneumonitis           | 1 (4)       | 1       | 0       | 0       | 0       |
| Headache              | 1 (4)       | 1       | 0       | 0       | 0       |
| Nail change           | 1 (4)       | 1       | 0       | 0       | 0       |
| Nausea                | 1 (4)       | 1       | 0       | 0       | 0       |
| Urinary retention     | 1 (4)       | 1       | 0       | 0       | 0       |
| Sore throat           | 1 (4)       | 1       | 0       | 0       | 0       |
| Thirst                | 1 (4)       | 1       | 0       | 0       | 0       |

## Supplementary Figures

**Figure S1.** Kaplan-Meier plots for (A) progression-free survival, (B) overall survival, (C) progression-free survival according to soluble CD30, and (d) overall survival according to soluble CD30.

Figure S1 (A)

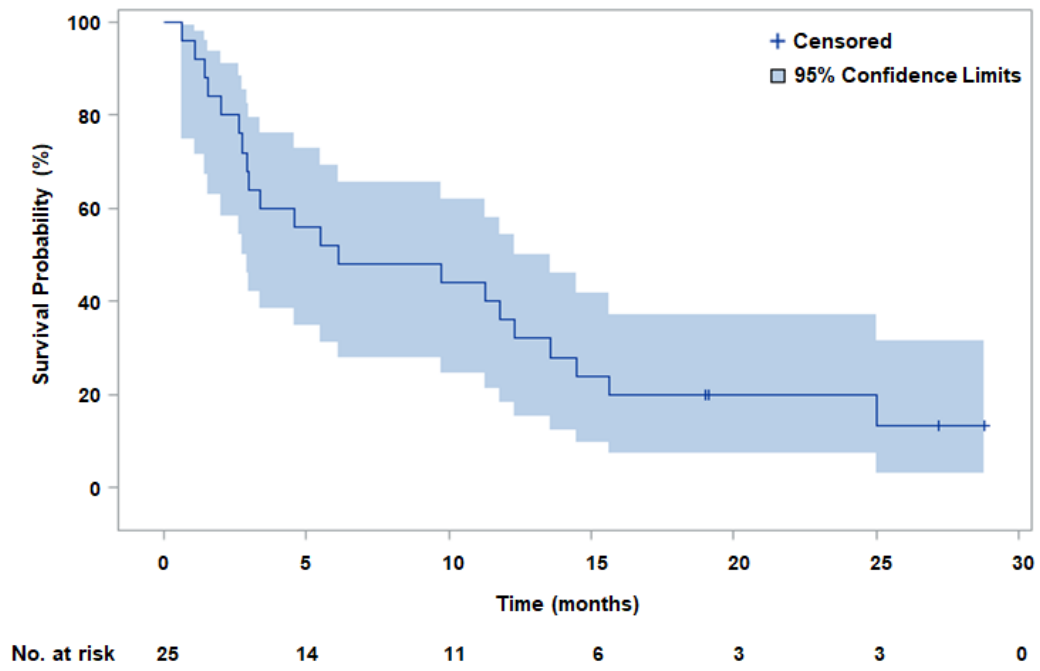

Figure S1 (B)

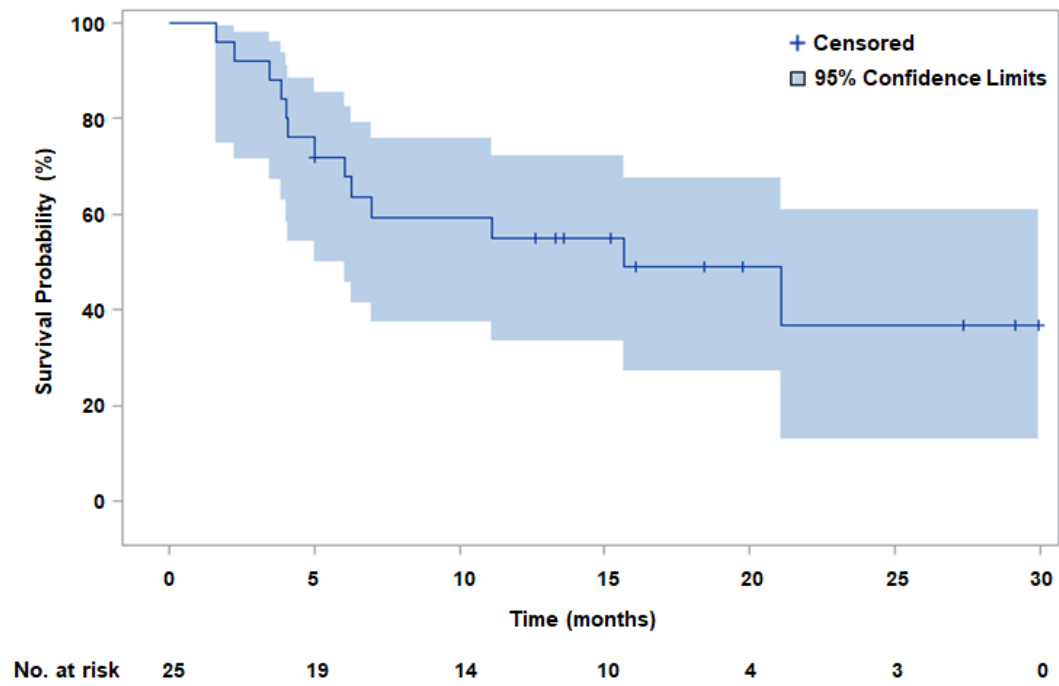

Figure S1 (C)

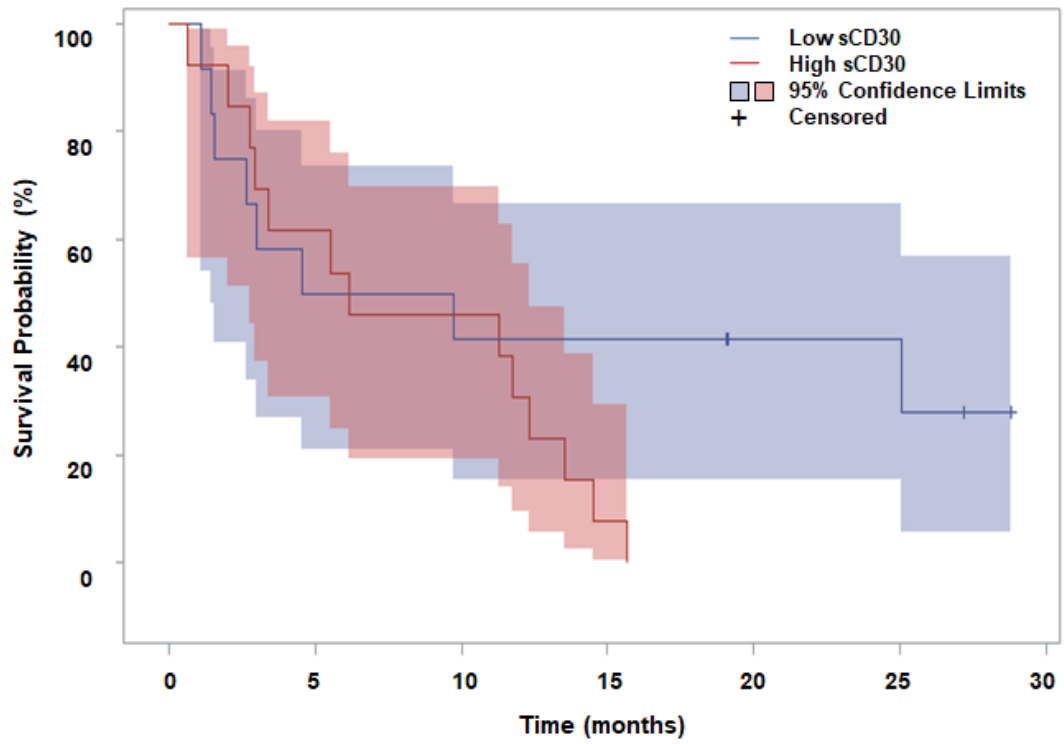

Figure S1 (D)

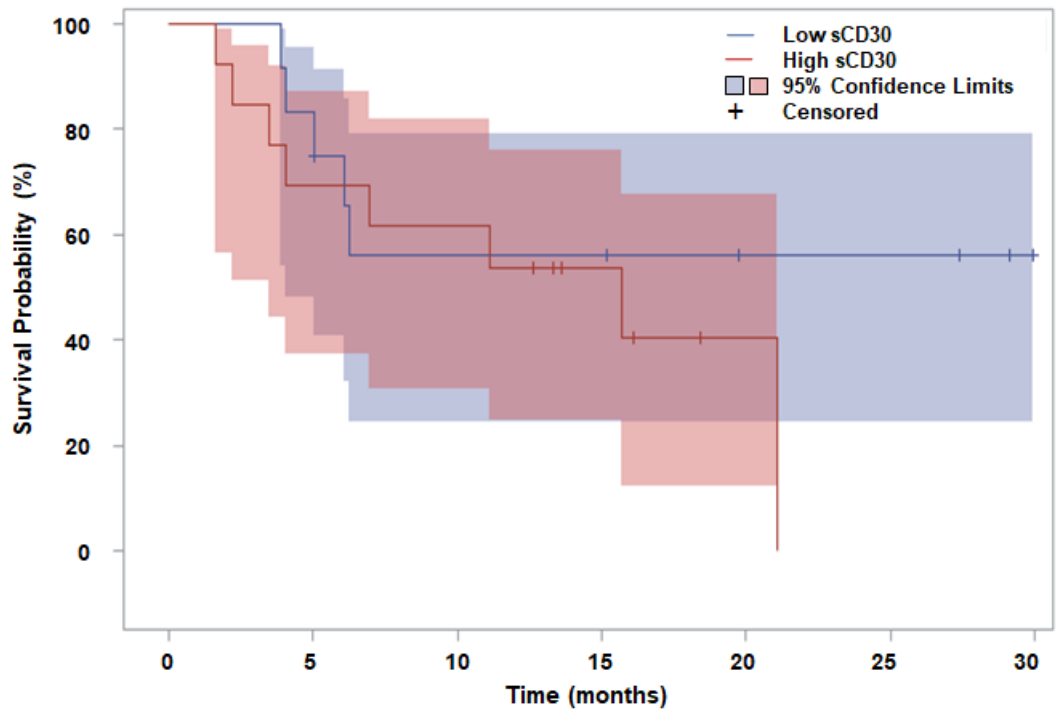

Supplement: 2021_278301_KIM_SUPPL.pdf [file 2021_278301_KIM_SUPPL.pdf]
